# Supplementary material
Source: Springer Nature journal article supplement (https://www.springermedizin.de/resource/supplementary/13058_2004_946_MOESM4_ESM.pdf/9705688)

**(a)**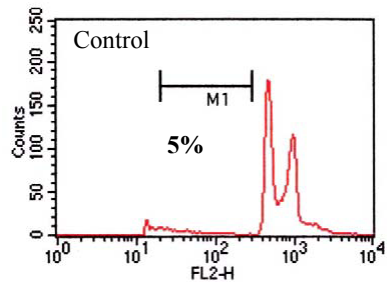**(b)**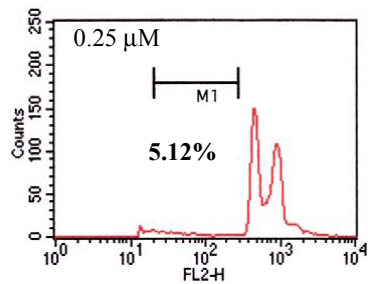**(c)**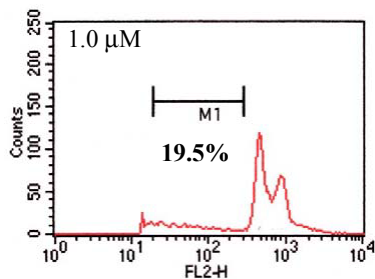**(d)**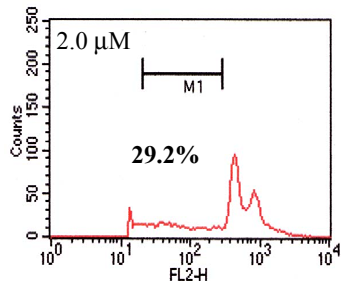

Supplement: MOESM4 [file 9705688]
